# Supplementary material for: Tropical Fishes Dominate Temperate Reef Fish Communities within Western Japan
Source: PubMed Central journal article supplement (PMC3849258; doi:10.1371/journal.pone.0081107), 2013-12-03

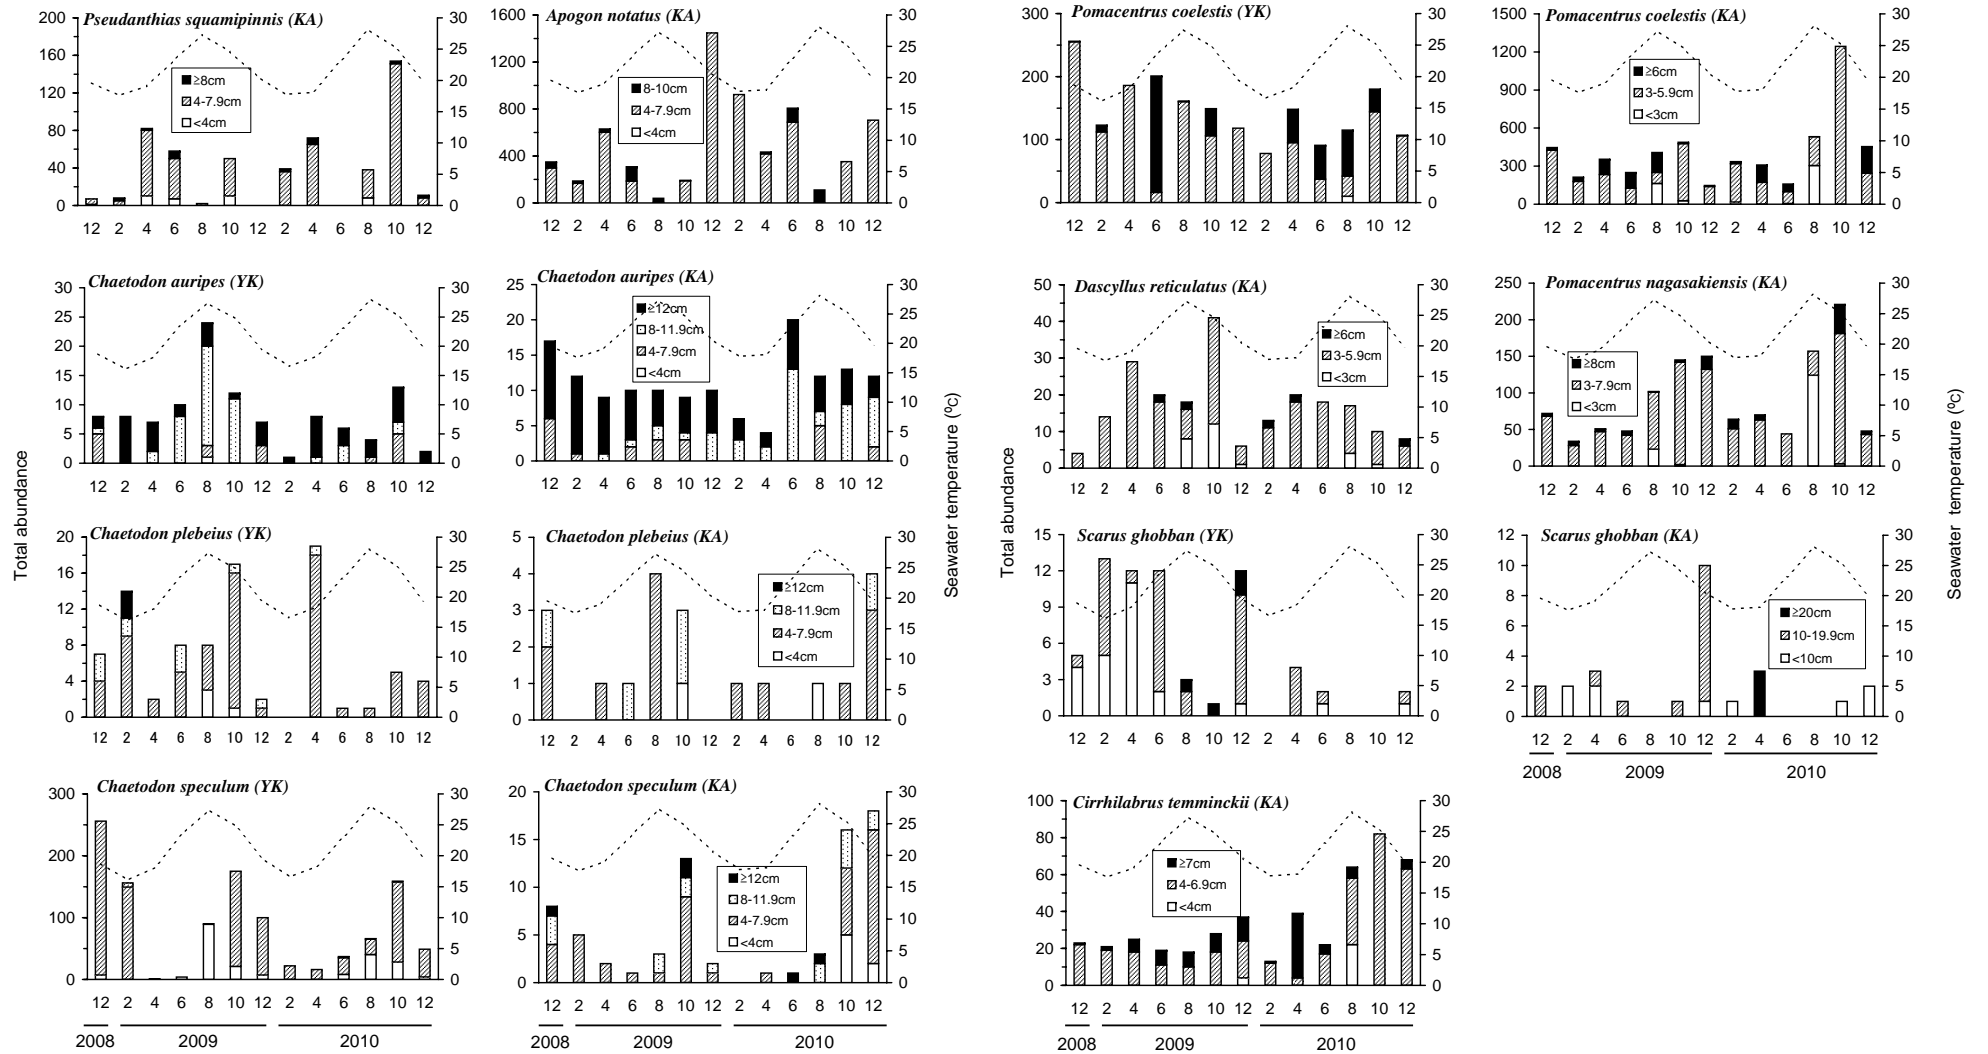

Supplement: pone.0081107.s001.pdf [file pone.0081107.s001.pdf]
