# Supplementary material for: Tropical Fishes Dominate Temperate Reef Fish Communities within Western Japan
Source: PubMed Central journal article supplement (PMC3849258; doi:10.1371/journal.pone.0081107), 2013-12-03
Supplement: pone.0081107.s002.pdf [file pone.0081107.s002.pdf]

Table S1. Total abundance of each fish species across all the transects in rocky and coral habitats at Yokonami and Kashiwajima during the study period.  
n = 65 in each habitat in each location. \*Recorded in Kamohara (1964)[34]

| Family                             | Species                               | Distribution range                   | Feeding group | Yokonami   |       | Kashiwajima |       | Total |    |
|------------------------------------|---------------------------------------|--------------------------------------|---------------|------------|-------|-------------|-------|-------|----|
|                                    |                                       |                                      |               | Rock       | Coral | Rock        | Coral |       |    |
| Muraenidae                         | <i>Echidna nebulosa</i>               | Tropical                             | Benthivore    | 0          | 0     | 0           | 1     | 1     |    |
|                                    | * <i>Enchelycore pardalis</i>         | Tropical                             | Piscivore     | 0          | 0     | 3           | 1     | 4     |    |
|                                    | * <i>Gymnothorax kidako</i>           | Tropical                             | Piscivore     | 0          | 0     | 1           | 4     | 5     |    |
|                                    | * <i>Gymnothorax melegrisi</i>        | Tropical                             | Piscivore     | 0          | 0     | 0           | 2     | 2     |    |
|                                    | * <i>Gymnothorax undulatus</i>        | Tropical                             | Piscivore     | 0          | 0     | 0           | 1     | 1     |    |
| Ophichthidae                       | <i>Myrichthys colubrinus</i>          | Tropical                             | Benthivore    | 0          | 0     | 1           | 0     | 1     |    |
|                                    | * <i>Myrichthys maculosus</i>         | Tropical                             | Benthivore    | 0          | 0     | 0           | 1     | 1     |    |
| Congridae                          | * <i>Conger myriaster</i>             | Temperate                            | Benthivore    | 0          | 0     | 0           | 1     | 1     |    |
| Synodontidae                       | <i>Synodus dermatogenys</i>           | Tropical                             | Piscivore     | 0          | 0     | 1           | 0     | 1     |    |
|                                    | * <i>Synodus hoshinonis</i>           | Tropical                             | Piscivore     | 0          | 0     | 1           | 0     | 1     |    |
|                                    | <i>Synodus ulae</i>                   | Tropical                             | Piscivore     | 0          | 0     | 1           | 0     | 1     |    |
|                                    | * <i>Synodus variegatus</i>           | Tropical                             | Piscivore     | 0          | 0     | 2           | 1     | 3     |    |
|                                    | * <i>Diademichthys lineatus</i>       | Tropical                             | Benthivore    | 0          | 0     | 34          | 84    | 118   |    |
| Gobiesocidae                       | * <i>Monocentris japonica</i>         | Tropical                             | Benthivore    | 0          | 0     | 1           | 1     | 2     |    |
| Monocentridae                      | * <i>Myripristis berndti</i>          | Tropical                             | Planktivore   | 0          | 0     | 0           | 3     | 3     |    |
|                                    | * <i>Neomiphon sammara</i>            | Tropical                             | Benthivore    | 0          | 0     | 1           | 1     | 2     |    |
| Holocentridae                      | * <i>Sargocentron itodai</i>          | Tropical                             | Benthivore    | 0          | 0     | 1           | 0     | 1     |    |
|                                    | * <i>Sargocentron rubrum</i>          | Subtropical                          | Benthivore    | 0          | 0     | 1           | 0     | 1     |    |
|                                    | * <i>Aulostomus chinensis</i>         | Tropical                             | Piscivore     | 0          | 0     | 1           | 2     | 3     |    |
| Aulostomidae                       | * <i>Fistularia commersonii</i>       | Tropical                             | Piscivore     | 0          | 1     | 3           | 10    | 14    |    |
| Fistulariidae                      | * <i>Corythoichthys haematopterus</i> | Tropical                             | Benthivore    | 0          | 0     | 8           | 4     | 12    |    |
| Syngnathidae                       | <i>Dendrochirus zebra</i>             | Tropical                             | Piscivore     | 0          | 0     | 3           | 3     | 6     |    |
| Scorpaenidae                       | * <i>Pterois lunulata</i>             | Tropical                             | Piscivore     | 0          | 0     | 2           | 8     | 10    |    |
|                                    | * <i>Pterois volitans</i>             | Tropical                             | Piscivore     | 0          | 0     | 0           | 3     | 3     |    |
|                                    | <i>Scorpaena onaria</i>               | Temperate                            | Piscivore     | 0          | 0     | 1           | 0     | 1     |    |
|                                    | * <i>Scorpaenodes littoralis</i>      | Temperate                            | Piscivore     | 0          | 0     | 3           | 1     | 4     |    |
|                                    | * <i>Sebastiscus marmoratus</i>       | Tropical                             | Piscivore     | 1          | 6     | 1           | 11    | 19    |    |
|                                    | * <i>Scorpaenopsis neglecta</i>       | Tropical                             | Piscivore     | 0          | 0     | 1           | 0     | 1     |    |
|                                    | Synanceiidae                          | * <i>Inimicus japonicus</i>          | Tropical      | Piscivore  | 0     | 0           | 0     | 1     | 1  |
|                                    | Serranidae                            | * <i>Cephalopholis miniata</i>       | Tropical      | Piscivore  | 0     | 0           | 0     | 1     | 1  |
|                                    |                                       | * <i>Epinephelus merra</i>           | Tropical      | Piscivore  | 0     | 0           | 0     | 1     | 1  |
|                                    |                                       | * <i>Epinephelus fasciatus</i>       | Tropical      | Piscivore  | 0     | 0           | 3     | 10    | 13 |
|                                    |                                       | * <i>Grammistes sexlineatus</i>      | Tropical      | Benthivore | 0     | 0           | 1     | 1     | 2  |
|                                    |                                       | * <i>Hyporthodus septemfasciatus</i> | Tropical      | Piscivore  | 0     | 0           | 0     | 4     | 4  |
| * <i>Plectropomus leopardus</i>    | Tropical                              | Piscivore                            | 0             | 2          | 0     | 1           | 3     |       |    |
| * <i>Pseudanthias squamipinnis</i> | Tropical                              | Planktivore                          | 0             | 0          | 38    | 483         | 521   |       |    |
| Plesiopidae                        | * <i>Plesiops coeruleolineatus</i>    | Tropical                             | Benthivore    | 0          | 0     | 1           | 0     | 1     |    |
| Apogonidae                         | * <i>Apogon doederleini</i>           | Subtropical                          | Benthivore    | 0          | 31    | 19          | 193   | 243   |    |
|                                    | * <i>Apogon notatus</i>               | Tropical                             | Benthivore    | 0          | 196   | 515         | 5966  | 6677  |    |
|                                    | * <i>Apogon properuptus</i>           | Subtropical                          | Benthivore    | 0          | 0     | 70          | 73    | 143   |    |
|                                    | * <i>Cheilodipterus macrodon</i>      | Tropical                             | Benthivore    | 3          | 0     | 5           | 21    | 29    |    |
|                                    | * <i>Cheilodipterus singapurensis</i> | Tropical                             | Benthivore    | 0          | 0     | 3           | 6     | 9     |    |
| Malacanthidae                      | * <i>Malacanthus latovittatus</i>     | Tropical                             | Benthivore    | 0          | 0     | 1           | 0     | 1     |    |
| Scombropidae                       | * <i>Scombrops boops</i>              | Temperate                            | Benthivore    | 5          | 0     | 0           | 0     | 5     |    |
| Carangidae                         | * <i>Alectis ciliaris</i>             | Subtropical                          | Benthivore    | 0          | 0     | 0           | 1     | 1     |    |
| Lutjanidae                         | * <i>Aprion virescens</i>             | Tropical                             | Piscivore     | 0          | 0     | 3           | 2     | 5     |    |
|                                    | * <i>Lutjanus gibbus</i>              | Tropical                             | Benthivore    | 1          | 0     | 0           | 1     | 2     |    |
|                                    | * <i>Lutjanus monostigma</i>          | Tropical                             | Benthivore    | 0          | 0     | 0           | 20    | 20    |    |
|                                    | * <i>Lutjanus russelli</i>            | Tropical                             | Benthivore    | 0          | 1     | 0           | 0     | 1     |    |
|                                    | * <i>Lutjanus stellatus</i>           | Subtropical                          | Benthivore    | 2          | 1     | 3           | 0     | 6     |    |
| Caesionidae                        | * <i>Caesio teres</i>                 | Tropical                             | Planktivore   | 0          | 0     | 0           | 9     | 9     |    |
| Gerreidae                          | * <i>Gerres oyena</i>                 | Tropical                             | Benthivore    | 14         | 1     | 5           | 0     | 20    |    |
| Haemulidae                         | * <i>Diagramma pictum</i>             | Tropical                             | Benthivore    | 1          | 2     | 0           | 1     | 4     |    |
|                                    | * <i>Plectorhinchus picus</i>         | Tropical                             | Benthivore    | 0          | 0     | 0           | 1     | 1     |    |
| Nemipteridae                       | <i>Scolopsis bilineata</i>            | Tropical                             | Benthivore    | 0          | 0     | 1           | 1     | 2     |    |
|                                    | <i>Scolopsis lineata</i>              | Tropical                             | Benthivore    | 0          | 0     | 1           | 1     | 2     |    |
| Sparidae                           | * <i>Pagrus major</i>                 | Subtropical                          | Benthivore    | 1          | 0     | 1           | 0     | 2     |    |
| Lethrinidae                        | * <i>Lethrinus nebulosus</i>          | Tropical                             | Benthivore    | 0          | 0     | 5           | 20    | 25    |    |
|                                    | * <i>Lethrinus genivittatus</i>       | Tropical                             | Benthivore    | 1          | 0     | 2           | 6     | 9     |    |
|                                    | <i>Monotaxis grandoculis</i>          | Tropical                             | Benthivore    | 0          | 0     | 1           | 0     | 1     |    |
| Mullidae                           | <i>Parupeneus barberinus</i>          | Tropical                             | Benthivore    | 0          | 0     | 1           | 0     | 1     |    |
|                                    | <i>Parupeneus ciliatus</i>            | Tropical                             | Benthivore    | 3          | 0     | 1           | 1     | 5     |    |
|                                    | <i>Parupeneus cyclostomus</i>         | Tropical                             | Benthivore    | 0          | 0     | 1           | 0     | 1     |    |
|                                    | * <i>Parupeneus indicus</i>           | Tropical                             | Benthivore    | 1          | 2     | 2           | 1     | 6     |    |
|                                    | * <i>Parupeneus multifasciatus</i>    | Tropical                             | Benthivore    | 19         | 24    | 13          | 15    | 71    |    |
|                                    | <i>Parupeneus pleurostigma</i>        | Tropical                             | Benthivore    | 0          | 0     | 1           | 1     | 2     |    |
|                                    | * <i>Parupeneus spilurus</i>          | Tropical                             | Benthivore    | 18         | 1     | 8           | 4     | 31    |    |
|                                    | <i>Parupeneus trifasciatus</i>        | Tropical                             | Benthivore    | 1          | 0     | 0           | 0     | 1     |    |
|                                    | <i>Mulloidichthys flavolineatus</i>   | Tropical                             | Benthivore    | 0          | 0     | 0           | 1     | 1     |    |
|                                    | * <i>Mulloidichthys vanicolensis</i>  | Tropical                             | Benthivore    | 0          | 0     | 11          | 0     | 11    |    |
|                                    | * <i>Upeneus tragula</i>              | Tropical                             | Benthivore    | 0          | 0     | 0           | 2     | 2     |    |
| Kyphosidae                         | * <i>Girella punctata</i>             | Temperate                            | Omnivore      | 130        | 5     | 46          | 14    | 195   |    |
|                                    | * <i>Kyphosus vaigiensis</i>          | Tropical                             | Omnivore      | 1          | 0     | 0           | 0     | 1     |    |
|                                    | * <i>Microcanthus strigatus</i>       | Tropical                             | Omnivore      | 4          | 3     | 0           | 0     | 7     |    |
| Ephippidae                         | * <i>Platax teira</i>                 | Tropical                             | Benthivore    | 0          | 2     | 0           | 0     | 2     |    |
| Chaetodontidae                     | * <i>Chaetodon auripes</i>            | Tropical                             | Benthivore    | 50         | 60    | 24          | 120   | 254   |    |
|                                    | * <i>Chaetodon auriga</i>             | Tropical                             | Benthivore    | 5          | 20    | 8           | 27    | 60    |    |
|                                    | * <i>Chaetodon bennetti</i>           | Tropical                             | Corallivore   | 0          | 3     | 0           | 1     | 4     |    |
|                                    | <i>Chaetodon baronessa</i>            | Tropical                             | Corallivore   | 0          | 2     | 0           | 6     | 8     |    |
|                                    | * <i>Chaetodon citrinellus</i>        | Tropical                             | Benthivore    | 0          | 0     | 0           | 1     | 1     |    |
|                                    | * <i>Chaetodon ephippium</i>          | Tropical                             | Omnivore      | 0          | 1     | 0           | 0     | 1     |    |
|                                    | * <i>Chaetodon kleini</i>             | Tropical                             | Corallivore   | 0          | 0     | 1           | 4     | 5     |    |
|                                    | * <i>Chaetodon lunula</i>             | Tropical                             | Benthivore    | 0          | 0     | 1           | 2     | 3     |    |
|                                    | * <i>Chaetodon lineolatus</i>         | Tropical                             | Corallivore   | 0          | 1     | 0           | 1     | 2     |    |
|                                    | * <i>Chaetodon melanotus</i>          | Tropical                             | Corallivore   | 0          | 143   | 0           | 29    | 172   |    |
|                                    | <i>Chaetodon oxycephalus</i>          | Tropical                             | Corallivore   | 0          | 7     | 0           | 6     | 13    |    |
|                                    | * <i>Chaetodon plebeius</i>           | Tropical                             | Corallivore   | 0          | 88    | 0           | 20    | 108   |    |
|                                    | * <i>Chaetodon rafflesi</i>           | Tropical                             | Benthivore    | 0          | 3     | 0           | 4     | 7     |    |
|                                    | <i>Chaetodon semeion</i>              | Tropical                             | Omnivore      | 0          | 1     | 0           | 0     | 1     |    |

|                  |                                          |             |              |     |      |      |      |      |
|------------------|------------------------------------------|-------------|--------------|-----|------|------|------|------|
|                  | * <i>Chaetodon speculum</i>              | Tropical    | Corallivore  | 0   | 1131 | 0    | 73   | 1204 |
|                  | * <i>Chaetodon lunulatus</i>             | Tropical    | Corallivore  | 0   | 337  | 0    | 58   | 395  |
|                  | * <i>Chaetodon trifascialis</i>          | Tropical    | Corallivore  | 0   | 24   | 0    | 48   | 72   |
|                  | <i>Chaetodon ulietensis</i>              | Tropical    | Omnivore     | 0   | 1    | 0    | 1    | 2    |
|                  | * <i>Chaetodon vagabundus</i>            | Tropical    | Omnivore     | 0   | 0    | 0    | 5    | 5    |
|                  | * <i>Coradion alivivis</i>               | Tropical    | Omnivore     | 0   | 0    | 0    | 4    | 4    |
|                  | * <i>Forcipiger flavissimus</i>          | Tropical    | Benthivore   | 0   | 0    | 0    | 1    | 1    |
|                  | <i>Heniochus monoceros</i>               | Tropical    | Benthivore   | 0   | 0    | 0    | 5    | 5    |
|                  | <i>Heniochus varius</i>                  | Tropical    | Benthivore   | 0   | 0    | 0    | 3    | 3    |
| Pomacanthidae    | <i>Centropyge heraldi</i>                | Tropical    | Herbivore    | 0   | 0    | 0    | 1    | 1    |
|                  | * <i>Centropyge interruptus</i>          | Temperate   | Omnivore     | 0   | 0    | 0    | 3    | 3    |
|                  | * <i>Centropyge tibicen</i>              | Tropical    | Herbivore    | 0   | 0    | 9    | 53   | 62   |
|                  | <i>Centropyge vrolikii</i>               | Tropical    | Herbivore    | 0   | 0    | 3    | 26   | 29   |
|                  | * <i>Chaetodontoplus septentrionalis</i> | Tropical    | Benthivore   | 0   | 0    | 2    | 14   | 16   |
| Oplegnathidae    | * <i>Oplegnathus fasciatus</i>           | Temperate   | Benthivore   | 0   | 0    | 2    | 0    | 2    |
|                  | * <i>Oplegnathus punctatus</i>           | Tropical    | Benthivore   | 0   | 0    | 3    | 0    | 3    |
| Pomacentridae    | <i>Abudefduf bengalensis</i>             | Tropical    | Omnivore     | 6   | 6    | 0    | 1    | 13   |
|                  | * <i>Abudefduf sexfasciatus</i>          | Tropical    | Planktivore  | 2   | 35   | 31   | 43   | 111  |
|                  | * <i>Abudefduf sordidus</i>              | Tropical    | Omnivore     | 2   | 0    | 0    | 0    | 2    |
|                  | * <i>Abudefduf vaigiensis</i>            | Tropical    | Omnivore     | 33  | 12   | 10   | 25   | 80   |
|                  | * <i>Amphiprion clarkii</i>              | Tropical    | Planktivore  | 0   | 23   | 5    | 76   | 104  |
|                  | <i>Amphiprion ocellaris</i>              | Tropical    | Omnivore     | 0   | 1    | 0    | 0    | 1    |
|                  | * <i>Chromis analis</i>                  | Tropical    | Planktivore  | 0   | 0    | 1    | 0    | 1    |
|                  | * <i>Chromis chrysurus</i>               | Tropical    | Planktivore  | 0   | 0    | 0    | 12   | 12   |
|                  | * <i>Chromis flavomaculata</i>           | Subtropical | Planktivore  | 0   | 0    | 0    | 2    | 2    |
|                  | * <i>Chromis fumea</i>                   | Tropical    | Planktivore  | 0   | 0    | 0    | 5    | 5    |
|                  | <i>Chromis lepidolepis</i>               | Tropical    | Planktivore  | 0   | 0    | 2    | 8    | 10   |
|                  | * <i>Chromis margaritifer</i>            | Tropical    | Planktivore  | 0   | 0    | 0    | 13   | 13   |
|                  | * <i>Chromis notata</i>                  | Subtropical | Planktivore  | 0   | 0    | 0    | 2    | 2    |
|                  | <i>Chromis weberi</i>                    | Tropical    | Planktivore  | 0   | 0    | 0    | 115  | 115  |
|                  | * <i>Chrysiptera cyanea</i>              | Tropical    | Omnivore     | 0   | 0    | 87   | 0    | 87   |
|                  | <i>Dascyllus reticulatus</i>             | Tropical    | Omnivore     | 0   | 0    | 0    | 218  | 218  |
|                  | <i>Dascyllus trimaculatus</i>            | Tropical    | Omnivore     | 0   | 0    | 12   | 44   | 56   |
|                  | <i>Neoglyphidodon melas</i>              | Tropical    | Benthivore   | 0   | 0    | 3    | 0    | 3    |
|                  | * <i>Neoglyphidodon nigroris</i>         | Tropical    | Omnivore     | 0   | 0    | 0    | 1    | 1    |
|                  | * <i>Plectroglyphidodon leucozonus</i>   | Tropical    | Herbivore    | 9   | 0    | 0    | 1    | 10   |
|                  | <i>Plectroglyphidodon lacrymatus</i>     | Tropical    | Omnivore     | 0   | 0    | 0    | 5    | 5    |
|                  | <i>Plectroglyphidodon johnstonianus</i>  | Tropical    | Omnivore     | 0   | 0    | 0    | 1    | 1    |
|                  | <i>Plectroglyphidodon dickii</i>         | Tropical    | Omnivore     | 0   | 0    | 0    | 3    | 3    |
|                  | * <i>Pomacentrus bankanensis</i>         | Tropical    | Omnivore     | 1   | 0    | 0    | 0    | 1    |
|                  | <i>Pomacentrus chrysurus</i>             | Tropical    | Herbivore    | 1   | 0    | 0    | 0    | 1    |
|                  | * <i>Pomacentrus coelestis</i>           | Tropical    | Planktivore  | 777 | 1136 | 1606 | 3734 | 7253 |
|                  | * <i>Pomacentrus nagasakiensis</i>       | Tropical    | Planktivore  | 0   | 1    | 439  | 767  | 1207 |
|                  | <i>Pomachromis richardsoni</i>           | Tropical    | Benthivore   | 0   | 0    | 0    | 4    | 4    |
|                  | * <i>Stegastes altus</i>                 | Subtropical | Herbivore    | 30  | 2    | 0    | 7    | 39   |
|                  | <i>Stegastes fasciolatus</i>             | Tropical    | Detritivore  | 6   | 0    | 0    | 0    | 6    |
| Cirrhitidae      | * <i>Cirrhitichthys aprinus</i>          | Tropical    | Benthivore   | 0   | 0    | 0    | 3    | 3    |
|                  | <i>Paracirrhites arcatus</i>             | Tropical    | Benthivore   | 0   | 0    | 0    | 18   | 18   |
|                  | * <i>Cirrhitichthys aureus</i>           | Tropical    | Benthivore   | 0   | 0    | 0    | 1    | 1    |
|                  | <i>Cirrhitichthys falco</i>              | Tropical    | Benthivore   | 0   | 0    | 0    | 3    | 3    |
|                  | * <i>Paracirrhites forsteri</i>          | Tropical    | Benthivore   | 0   | 0    | 0    | 15   | 15   |
| Cheilodactylidae | * <i>Goniistius zonatus</i>              | Tropical    | Benthivore   | 34  | 1    | 9    | 4    | 48   |
|                  | * <i>Goniistius zebra</i>                | Temperate   | Benthivore   | 0   | 0    | 1    | 2    | 3    |
| Mugilidae        | * <i>Mugil cephalus</i>                  | Subtropical | Detritivore  | 5   | 0    | 3    | 0    | 8    |
| Labridae         | * <i>Anampses caeruleopunctatus</i>      | Tropical    | Benthivore   | 0   | 0    | 2    | 3    | 5    |
|                  | <i>Anampses melanurus</i>                | Tropical    | Benthivore   | 0   | 0    | 0    | 1    | 1    |
|                  | * <i>Anampses meleagrides</i>            | Tropical    | Benthivore   | 0   | 0    | 0    | 11   | 11   |
|                  | <i>Anampses twisii</i>                   | Tropical    | Benthivore   | 0   | 0    | 1    | 2    | 3    |
|                  | <i>Bodianus axillaris</i>                | Tropical    | Benthivore   | 0   | 0    | 0    | 2    | 2    |
|                  | * <i>Bodianus bilunulatus</i>            | Tropical    | Benthivore   | 0   | 0    | 0    | 1    | 1    |
|                  | <i>Bodianus dictynna</i>                 | Tropical    | Benthivore   | 0   | 0    | 0    | 1    | 1    |
|                  | * <i>Cheilio inermis</i>                 | Tropical    | Benthivore   | 1   | 0    | 0    | 0    | 1    |
|                  | <i>Cheilinus celebicus</i>               | Tropical    | Benthivore   | 0   | 0    | 0    | 2    | 2    |
|                  | <i>Cheilinus chlorourus</i>              | Tropical    | Benthivore   | 0   | 0    | 1    | 0    | 1    |
|                  | * <i>Choerodon azurio</i>                | Subtropical | Benthivore   | 0   | 0    | 1    | 1    | 2    |
|                  | * <i>Cirrhilabrus temminckii</i>         | Tropical    | Planktivore  | 0   | 0    | 164  | 295  | 459  |
|                  | * <i>Coris aygula</i>                    | Tropical    | Benthivore   | 0   | 0    | 1    | 1    | 2    |
|                  | * <i>Coris batuensis</i>                 | Tropical    | Benthivore   | 0   | 1    | 0    | 2    | 3    |
|                  | * <i>Coris dorsomacula</i>               | Tropical    | Benthivore   | 0   | 0    | 5    | 11   | 16   |
|                  | * <i>Coris gaimard</i>                   | Tropical    | Benthivore   | 0   | 0    | 0    | 3    | 3    |
|                  | <i>Cymolutes torquatus</i>               | Tropical    | Benthivore   | 0   | 0    | 3    | 3    | 6    |
|                  | * <i>Gomphosus varius</i>                | Tropical    | Benthivore   | 0   | 7    | 5    | 31   | 43   |
|                  | <i>Halichoeres chrysurus</i>             | Tropical    | Benthivore   | 0   | 0    | 5    | 12   | 17   |
|                  | <i>Halichoeres hortulanus</i>            | Tropical    | Benthivore   | 0   | 0    | 0    | 1    | 1    |
|                  | * <i>Halichoeres marginatus</i>          | Tropical    | Benthivore   | 0   | 0    | 2    | 1    | 3    |
|                  | <i>Halichoeres melanurus</i>             | Tropical    | Benthivore   | 0   | 0    | 0    | 5    | 5    |
|                  | * <i>Halichoeres melanochir</i>          | Tropical    | Benthivore   | 2   | 0    | 4    | 5    | 11   |
|                  | <i>Halichoeres nebulosus</i>             | Subtropical | Benthivore   | 5   | 0    | 5    | 0    | 10   |
|                  | <i>Halichoeres prosopion</i>             | Tropical    | Benthivore   | 0   | 0    | 1    | 3    | 4    |
|                  | <i>Halichoeres scapularis</i>            | Tropical    | Benthivore   | 0   | 0    | 1    | 0    | 1    |
|                  | <i>Halichoeres trimaculatus</i>          | Tropical    | Benthivore   | 0   | 0    | 0    | 1    | 1    |
|                  | * <i>Halichoeres tenuispinis</i>         | Tropical    | Benthivore   | 38  | 26   | 12   | 13   | 89   |
|                  | * <i>Hemigymmus fasciatus</i>            | Tropical    | Benthivore   | 0   | 2    | 2    | 10   | 14   |
|                  | <i>Hemigymmus melapterus</i>             | Tropical    | Benthivore   | 0   | 2    | 0    | 6    | 8    |
|                  | * <i>Hologymmosus annulatus</i>          | Tropical    | Benthivore   | 0   | 0    | 2    | 5    | 7    |
|                  | * <i>Labroides dimidiatus</i>            | Tropical    | Cleaner fish | 0   | 15   | 19   | 55   | 89   |
|                  | * <i>Macropharyngodon meleagris</i>      | Tropical    | Benthivore   | 0   | 0    | 4    | 1    | 5    |
|                  | * <i>Oxycheilinus bimaculatus</i>        | Tropical    | Benthivore   | 0   | 0    | 4    | 3    | 7    |
|                  | * <i>Pseudolabrus eoethinus</i>          | Subtropical | Benthivore   | 71  | 24   | 13   | 43   | 151  |
|                  | <i>Pseudolabrus sieboldi</i>             | Subtropical | Benthivore   | 0   | 0    | 1    | 2    | 3    |
|                  | <i>Pseudocheilinus hexataenia</i>        | Tropical    | Benthivore   | 0   | 0    | 1    | 30   | 31   |
|                  | * <i>Stethojulis bandanensis</i>         | Tropical    | Benthivore   | 0   | 0    | 0    | 3    | 3    |
|                  | * <i>Stethojulis interrupta</i>          | Temperate   | Benthivore   | 467 | 75   | 100  | 124  | 766  |
|                  | <i>Stethojulis strigiventer</i>          | Tropical    | Benthivore   | 0   | 1    | 0    | 0    | 1    |
|                  | * <i>Thalassoma amblycephalum</i>        | Subtropical | Planktivore  | 4   | 0    | 38   | 103  | 145  |
|                  | * <i>Thalassoma cupido</i>               | Subtropical | Benthivore   | 178 | 216  | 70   | 275  | 739  |
|                  | * <i>Thalassoma hardwicke</i>            | Tropical    | Benthivore   | 0   | 10   | 12   | 27   | 49   |
|                  | * <i>Thalassoma lutescens</i>            | Subtropical | Benthivore   | 8   | 7    | 25   | 82   | 122  |

|                |                                         |             |             |      |      |      |       |       |
|----------------|-----------------------------------------|-------------|-------------|------|------|------|-------|-------|
|                | * <i>Thalassoma lunare</i>              | Subtropical | Benthivore  | 14   | 54   | 80   | 246   | 394   |
|                | * <i>Thalassoma purpureum</i>           | Tropical    | Benthivore  | 0    | 0    | 0    | 1     | 1     |
|                | Labridae spp.(unidentified juveniles)   | Tropical    | Benthivore  | 0    | 3    | 0    | 1     | 4     |
| Scaridae       | * <i>Calotomus japonicus</i>            | Subtropical | Herbivore   | 49   | 4    | 29   | 17    | 99    |
|                | <i>Chlorurus microrhinos</i>            | Tropical    | Herbivore   | 0    | 0    | 1    | 0     | 1     |
|                | <i>Chlorurus sordidus</i>               | Tropical    | Herbivore   | 0    | 1    | 3    | 6     | 10    |
|                | <i>Scarus altipinnis</i>                | Tropical    | Herbivore   | 0    | 2    | 0    | 3     | 5     |
|                | <i>Scarus frenatus</i>                  | Tropical    | Herbivore   | 0    | 0    | 0    | 1     | 1     |
|                | * <i>Scarus ghobban</i>                 | Tropical    | Herbivore   | 11   | 55   | 2    | 24    | 92    |
|                | * <i>Scarus ovifrons</i>                | Subtropical | Herbivore   | 1    | 6    | 5    | 5     | 17    |
|                | <i>Scarus prasiognathos</i>             | Tropical    | Herbivore   | 0    | 3    | 0    | 0     | 3     |
|                | <i>Scarus niger</i>                     | Tropical    | Herbivore   | 0    | 0    | 0    | 4     | 4     |
|                | <i>Scarus rivulatus</i>                 | Tropical    | Herbivore   | 0    | 0    | 2    | 1     | 3     |
|                | <i>Scarus rubroviolaceus</i>            | Tropical    | Herbivore   | 0    | 0    | 1    | 2     | 3     |
|                | Scaridae sp.1                           | Tropical    | Herbivore   | 0    | 1    | 0    | 0     | 1     |
|                | Scaridae spp.(unidentified juveniles)   | Tropical    | Herbivore   | 4    | 23   | 56   | 66    | 149   |
| Pinguipedidae  | <i>Parapercis kamoharai</i>             | Subtropical | Benthivore  | 0    | 0    | 4    | 2     | 6     |
|                | <i>Parapercis millepunctata</i>         | Tropical    | Benthivore  | 0    | 0    | 0    | 1     | 1     |
|                | * <i>Parapercis snyderi</i>             | Subtropical | Benthivore  | 0    | 0    | 4    | 2     | 6     |
|                | * <i>Parapercis tetracantha</i>         | Tropical    | Benthivore  | 0    | 0    | 1    | 0     | 1     |
| Bleniidae      | <i>Arosalarias holomelas</i>            | Tropical    | Detritivore | 0    | 0    | 0    | 1     | 1     |
|                | <i>Ecesmius bicolor</i>                 | Tropical    | Herbivore   | 0    | 0    | 0    | 1     | 1     |
|                | * <i>Istiblennius edentulus</i>         | Tropical    | Herbivore   | 1    | 0    | 0    | 0     | 1     |
|                | * <i>Meiacanthus kamoharai</i>          | Temperate   | Omnivore    | 0    | 0    | 10   | 12    | 22    |
|                | * <i>Plagiotremus tapeinosoma</i>       | Tropical    | Piscivore   | 0    | 0    | 1    | 0     | 1     |
|                | * <i>Petroscirtes breviceps</i>         | Tropical    | Benthivore  | 0    | 0    | 5    | 4     | 9     |
|                | * <i>Plagiotremus rhinorhynchos</i>     | Tropical    | Benthivore  | 0    | 0    | 0    | 1     | 1     |
| Callionymidae  | <i>Minysynchiropus kiyoei</i>           | Temperate   | Benthivore  | 0    | 0    | 0    | 1     | 1     |
|                | <i>Neosynchiropus moyeri</i>            | Temperate   | Benthivore  | 0    | 0    | 9    | 1     | 10    |
|                | Callionymidae sp.1                      | Temperate   | Benthivore  | 0    | 0    | 0    | 1     | 1     |
| Gobiidae       | <i>Fusigobius neophytus</i>             | Tropical    | Benthivore  | 0    | 0    | 0    | 1     | 1     |
|                | <i>Fusigobius duospilus</i>             | Tropical    | Benthivore  | 0    | 0    | 0    | 1     | 1     |
|                | <i>Gobiodon quinquestrigatus</i>        | Tropical    | Corallivore | 0    | 0    | 0    | 6     | 6     |
|                | <i>Istigobius ornatus</i>               | Tropical    | Benthivore  | 0    | 0    | 6    | 1     | 7     |
|                | <i>Istigobius campbelli</i>             | Tropical    | Benthivore  | 0    | 0    | 1    | 3     | 4     |
|                | <i>Paragobiodon modestus</i>            | Tropical    | Corallivore | 0    | 0    | 0    | 2     | 2     |
|                | <i>Prereleotris evides</i>              | Tropical    | Planktivore | 0    | 11   | 10   | 26    | 47    |
|                | * <i>Gobiodon</i> sp.1                  | Tropical    | Corallivore | 0    | 0    | 0    | 10    | 10    |
|                | * <i>Gobiodon</i> sp.2                  | Tropical    | Corallivore | 0    | 0    | 0    | 9     | 9     |
|                | <i>Eviota</i> sp.                       | Tropical    | Benthivore  | 0    | 0    | 0    | 1     | 1     |
| Microdesmidae  | <i>Gunnellichthys monostigma</i>        | Tropical    | Benthivore  | 0    | 2    | 0    | 9     | 11    |
| Siganidae      | * <i>Siganus fuscescens</i>             | Tropical    | Herbivore   | 5    | 0    | 1    | 0     | 6     |
|                | <i>Siganus spinus</i>                   | Tropical    | Herbivore   | 1    | 0    | 0    | 0     | 1     |
| Zanclidae      | * <i>Zanclus cornutus</i>               | Subtropical | Benthivore  | 0    | 3    | 5    | 18    | 26    |
| Acanthuridae   | <i>Acanthurus lineatus</i>              | Tropical    | Herbivore   | 3    | 3    | 0    | 0     | 6     |
|                | * <i>Acanthurus dussumieri</i>          | Tropical    | Herbivore   | 48   | 73   | 18   | 13    | 152   |
|                | * <i>Acanthurus nigrofuscus</i>         | Tropical    | Herbivore   | 3    | 26   | 36   | 10    | 75    |
|                | <i>Acanthurus maculiceps</i>            | Tropical    | Herbivore   | 3    | 0    | 0    | 0     | 3     |
|                | <i>Acanthurus mata</i>                  | Tropical    | Planktivore | 0    | 0    | 0    | 5     | 5     |
|                | * <i>Acanthurus xanthopterus</i>        | Tropical    | Herbivore   | 0    | 0    | 0    | 7     | 7     |
|                | <i>Ctenochaetus striatus</i>            | Tropical    | Herbivore   | 0    | 0    | 0    | 1     | 1     |
|                | <i>Naso lituratus</i>                   | Tropical    | Herbivore   | 0    | 1    | 0    | 2     | 3     |
|                | * <i>Naso unicornis</i>                 | Tropical    | Herbivore   | 5    | 5    | 0    | 1     | 11    |
|                | * <i>Prionurus scalprum</i>             | Subtropical | Herbivore   | 107  | 46   | 44   | 16    | 213   |
|                | <i>Zebrasoma scopas</i>                 | Tropical    | Herbivore   | 0    | 2    | 0    | 3     | 5     |
|                | * <i>Zebrasoma velifer</i>              | Tropical    | Herbivore   | 0    | 8    | 1    | 9     | 18    |
| Sphyrnidae     | * <i>Sphyrna japonica</i>               | Temperate   | Piscivore   | 0    | 0    | 0    | 72    | 72    |
| Balistidae     | * <i>Balistapus undulatus</i>           | Tropical    | Omnivore    | 0    | 0    | 0    | 2     | 2     |
|                | * <i>Melichthys vidua</i>               | Tropical    | Herbivore   | 0    | 0    | 0    | 1     | 1     |
|                | <i>Odonus niger</i>                     | Tropical    | Planktivore | 0    | 0    | 1    | 1     | 2     |
|                | * <i>Pseudobalistes flavimarginatus</i> | Tropical    | Benthivore  | 0    | 1    | 0    | 0     | 1     |
|                | * <i>Sufflamen chrysopterum</i>         | Tropical    | Benthivore  | 0    | 0    | 12   | 24    | 36    |
| Monacanthidae  | * <i>Cantherhines dumerilii</i>         | Tropical    | Benthivore  | 0    | 0    | 1    | 1     | 2     |
|                | <i>Paraluteres prionurus</i>            | Tropical    | Benthivore  | 0    | 0    | 1    | 0     | 1     |
|                | <i>Pervagor melanocephalus</i>          | Tropical    | Benthivore  | 0    | 0    | 0    | 1     | 1     |
|                | * <i>Rudarius ercodes</i>               | Temperate   | Benthivore  | 0    | 0    | 2    | 1     | 3     |
|                | * <i>Stephanolepis cirrhifer</i>        | Temperate   | Omnivore    | 3    | 1    | 23   | 22    | 49    |
|                | <i>Oxymonacanthus longirostris</i>      | Tropical    | Corallivore | 0    | 1    | 0    | 0     | 1     |
| Ostraciidae    | * <i>Lactoria diaphana</i>              | Subtropical | Benthivore  | 1    | 0    | 7    | 7     | 15    |
|                | <i>Lactoria formosini</i>               | Tropical    | Benthivore  | 0    | 0    | 3    | 4     | 7     |
|                | <i>Ostracion cubicus</i>                | Tropical    | Omnivore    | 1    | 0    | 1    | 4     | 6     |
|                | * <i>Ostracion immaculatus</i>          | Temperate   | Benthivore  | 4    | 1    | 8    | 6     | 19    |
| Tetraodontidae | * <i>Arothron hispidus</i>              | Tropical    | Omnivore    | 0    | 0    | 1    | 0     | 1     |
|                | <i>Canthigaster coronata</i>            | Tropical    | Omnivore    | 0    | 0    | 2    | 2     | 4     |
|                | * <i>Canthigaster rivulata</i>          | Tropical    | Omnivore    | 1    | 0    | 3    | 2     | 6     |
|                | * <i>Canthigaster valentini</i>         | Tropical    | Omnivore    | 0    | 0    | 7    | 10    | 17    |
| Diodontidae    | * <i>Chilomycterus reticulatus</i>      | Subtropical | Benthivore  | 0    | 0    | 0    | 1     | 1     |
|                | * <i>Diodon holocanthus</i>             | Subtropical | Benthivore  | 2    | 0    | 6    | 12    | 20    |
|                | Total species numbers                   |             |             | 60   | 76   | 140  | 210   | 265   |
|                | Total individual numbers                |             |             | 2208 | 4039 | 4012 | 14566 | 24825 |
