# Supplementary material for: Tropical Fishes Dominate Temperate Reef Fish Communities within Western Japan
Source: PubMed Central journal article supplement (PMC3849258; doi:10.1371/journal.pone.0081107), 2013-12-03
Supplement: pone.0081107.s003.pdf [file pone.0081107.s003.pdf]

Table S2. List of possible overwintering tropical species; i.e. species observed in both middle winter (February) and following early spring (April). Numbers indicate total abundance of each tropical species across all the transects in rocky and coral habitats at Yokonami and Kashiwajima during February and April in 2009 and 2010.

| Family           | Species                                | Yokonami |       | Kashiwajima |       |
|------------------|----------------------------------------|----------|-------|-------------|-------|
|                  |                                        | February | April | February    | April |
| Gobiesocidae     | <i>Diademichthys lineatus</i>          | 0        | 0     | 13          | 21    |
| Fistulariidae    | <i>Fistularia commersonii</i>          | 0        | 0     | 7           | 1     |
| Serranidae       | <i>Pseudanthias squamipinnis</i>       | 0        | 0     | 47          | 154   |
| Apogonidae       | <i>Apogon notatus</i>                  | 0        | 0     | 1109        | 1062  |
|                  | <i>Cheilodipterus macrodon</i>         | 0        | 0     | 3           | 1     |
|                  | <i>Cheilodipterus singapurensis</i>    | 0        | 0     | 4           | 1     |
| Caesionidae      | <i>Caesio teres</i>                    | 0        | 0     | 5           | 3     |
| Gerreidae        | <i>Gerres oyena</i>                    | 0        | 0     | 2           | 2     |
| Mullidae         | <i>Parupeneus multifasciatus</i>       | 0        | 0     | 3           | 2     |
| Chaetodontidae   | <i>Chaetodon auripes</i>               | 9        | 15    | 18          | 13    |
|                  | <i>Chaetodon auriga</i>                | 0        | 0     | 1           | 2     |
|                  | <i>Chaetodon plebeius</i>              | 14       | 21    | 1           | 2     |
|                  | <i>Chaetodon speculum</i>              | 178      | 17    | 5           | 3     |
|                  | <i>Chaetodon lunulatus</i>             | 0        | 0     | 2           | 3     |
| Pomacanthidae    | <i>Centropyge tibicen</i>              | 0        | 0     | 9           | 8     |
|                  | <i>Centropyge vrolikii</i>             | 0        | 0     | 3           | 1     |
|                  | <i>Chaetodontoplus septentrionalis</i> | 0        | 0     | 2           | 2     |
| Pomacentridae    | <i>Abudefduf vaigiensis</i>            | 2        | 1     | 1           | 0     |
|                  | <i>Amphiprion clarkii</i>              | 1        | 3     | 8           | 10    |
|                  | <i>Dascyllus reticulatus</i>           | 0        | 0     | 27          | 49    |
|                  | <i>Dascyllus trimaculatus</i>          | 0        | 0     | 9           | 2     |
|                  | <i>Plectroglyphidodon dickii</i>       | 0        | 0     | 1           | 1     |
|                  | <i>Pomacentrus coelestis</i>           | 201      | 334   | 548         | 663   |
|                  | <i>Pomacentrus nagasakiensis</i>       | 0        | 0     | 98          | 121   |
| Cirrhitidae      | <i>Paracirrhites forsteri</i>          | 0        | 0     | 1           | 1     |
| Cheilodactylidae | <i>Goniistius zonatus</i>              | 2        | 2     | 4           | 3     |
| Labridae         | <i>Anampses meleagrides</i>            | 0        | 0     | 3           | 3     |
|                  | <i>Cirrhilabrus temminckii</i>         | 0        | 0     | 34          | 64    |
|                  | <i>Coris dorsomacula</i>               | 0        | 0     | 4           | 5     |
|                  | <i>Gomphosus varius</i>                | 0        | 0     | 3           | 3     |
|                  | <i>Halichoeres tenuispinis</i>         | 1        | 1     | 5           | 5     |
|                  | <i>Hemigymnus fasciatus</i>            | 0        | 0     | 1           | 1     |
|                  | <i>Labroides dimidiatus</i>            | 0        | 0     | 12          | 15    |
|                  | <i>Pseudocheilinus hexataenia</i>      | 0        | 0     | 6           | 1     |
|                  | <i>Thalassoma hardwicke</i>            | 0        | 0     | 7           | 3     |
| Scaridae         | <i>Scarus ghobban</i>                  | 13       | 16    | 3           | 6     |
| Microdesmidae    | <i>Gunnellichthys monostigma</i>       | 0        | 0     | 2           | 1     |
| Acanthuridae     | <i>Acanthurus dussumieri</i>           | 7        | 9     | 0           | 0     |
| Balistidae       | <i>Sufflamen chrysopterum</i>          | 0        | 0     | 6           | 5     |
| Tetraodontidae   | <i>Canthigaster valentini</i>          | 0        | 0     | 4           | 2     |
